# Supplementary material for: Structural basis for lipid and copper regulation of the ABC transporter MsbA
Source: Nat Commun. 2022 Nov 26;13:7291. doi: 10.1038/s41467-022-34905-2 (PMC9701195; doi:10.1038/s41467-022-34905-2)
Supplement: Supplementary file 3 — Source Data [file 41467_2022_34905_MOESM3_ESM.xlsx]

## Sheet: Figure 1c
POPA								POPC
	Rep 1	Rep 2	Rep 3	Average	SD				Rep 1	Rep 2	Rep 3	Average	SD
KD 1	12.9424	14.5693	16.5392	14.6837	1.47061			KD 1	18.5661	21.7772	20.8537	20.399	1.34977
KD 2	24.0137	22.6928	22.7637	23.1567	0.606635			KD 2	36.6235	40.5971	41.2249	39.4818	2.03736
KD 3	24.8361	31.4137	29.2586	28.5028	2.73796			KD 3	40.1563	46.6884	51.2469	46.0306	4.55154
KD 4	26.9617	32.4467	33.0508	30.8197	2.73916			KD 4	58.7443	46.4503	35.6586	46.9511	9.43134
KD 5	31.3632	31.1778	35.3119	32.6177	1.90665			KD 5	27.5891	37.4007	37.4885	34.1594	4.64604
POPE								POPG
	Rep 1	Rep 2	Rep 3	Average	SD				Rep 1	Rep 2	Rep 3	Average	SD
KD 1	12.7134	12.9884	11.4775	12.3931	0.657068			KD 1	4.71456	4.44965	5.48018	4.88146	0.43695
KD 2	20.6099	25.1437	26.0389	23.9308	2.37654			KD 2	10.0203	11.1568	11.9845	11.0539	0.805182
KD 3	26.515	33.8445	34.1923	31.5173	3.53997			KD 3	15.0849	18.1814	18.9243	17.3969	1.66272
KD 4	25.3645	41.0955	30.8929	32.451	6.51598			KD 4	22.7033	23.9105	22.7673	23.127	0.55458
KD 5	26.6146	43.0898	31.457	33.7205	6.91377			KD 5	27.6331	27.892	25.81	27.1117	0.926484
POPS								TOCDL
	Rep 1	Rep 2	Rep 3	Average	SD				Rep 1	Rep 2	Rep 3	Average	SD
KD 1	3.42955	3.85285	3.64418	3.64219	0.172818			KD 1	1.75304	1.94322	2.09083	1.92903	0.138268
KD 2	8.757	8.81145	8.87943	8.81596	0.0500827			KD 2	3.36387	4.3815	5.04409	4.26315	0.691033
KD 3	14.0676	15.2776	14.6234	14.6562	0.494497			KD 3	5.57982	7.73911	6.75541	6.69145	0.882685
KD 4	18.3325	21.0995	21.2317	20.2212	1.33663			KD 4	7.5533	9.48363	11.2409	9.42593	1.50599
KD 5	20.657	22.7262	23.1448	22.176	1.0876			KD 5	10.1116	18.0749	9.29227	12.4929	3.96123
KDL
	Rep 1	Rep 2	Rep 3	Average	SD
KD 1	0.782144	0.872406	0.980209	0.878253	0.0809653
KD 2	1.37828	2.18845	2.34832	1.97168	0.424646
KD 3	3.54348	2.88326	3.95191	3.45955	0.440293
KD 4	5.30944	5.11346	4.59718	5.00669	0.300418

## Sheet: Figure 1f
POPA								POPC
	Rep 1	Rep 2	Rep 3	Average	SD				Rep 1	Rep 2	Rep 3	Average	SD
KD 1	2.59435	2.59165	2.68686	2.62428	0.0442605			KD 1	17.3023	16.403	17.9003	17.2019	0.615414
KD 2	5.64956	5.86263	5.56091	5.69103	0.126621			KD 2	35.4037	32.469	33.0709	33.6479	1.26564
KD 3	8.68268	8.67583	8.09637	8.48496	0.274786			KD 3	52.7838	49.6608	43.0561	48.5002	4.05524
KD 4	10.4426	10.9663	10.0704	10.4931	0.367474			KD 4	60.5704	51.5556	49.1125	53.7462	4.92743
KD 5	14.0817	14.5569	13.3171	13.9852	0.510728
POPE								POPG
	Rep 1	Rep 2	Rep 3	Average	SD				Rep 1	Rep 2	Rep 3	Average	SD
KD 1	7.67094	7.4108	7.00218	7.36131	0.275255			KD 1	4.22407	3.99491	4.06814	4.09571	0.0955645
KD 2	17.6385	19.2642	18.3685	18.4237	0.664819			KD 2	10.7134	10.2041	10.5129	10.4768	0.209478
KD 3	28.1671	27.0653	28.1035	27.7786	0.505071			KD 3	16.4555	15.7417	16.4782	16.2251	0.341971
KD 4	35.665	30.9126	32.7437	33.1071	1.95708			KD 4	21.0041	19.5887	21.2529	20.6152	0.73296
KD 5	43.1803	35.5049	40.6835	39.7896	3.19659			KD 5	26.5879	23.9568	25.6464	25.3971	1.08852
POPS								TOCDL
	Rep 1	Rep 2	Rep 3	Average	SD				Rep 1	Rep 2	Rep 3	Average	SD
KD 1	3.68306	3.76838	3.74029	3.73058	0.0355025			KD 1	1.72992	1.54373	1.67153	1.6484	0.0777529
KD 2	5.95007	5.46337	5.57467	5.6627	0.208216			KD 2	3.07952	2.90399	2.8612	2.94824	0.0944622
KD 3	10.0395	8.735	9.05451	9.27632	0.555164			KD 3	4.37168	4.12447	3.81123	4.10246	0.229331
KD 4	13.3745	12.4094	13.1043	12.9627	0.40653			KD 4	5.22004	5.2137	4.73689	5.05688	0.226278
KD 5	17.4214	16.3228	16.7861	16.8435	0.450347
KDL
	Rep 1	Rep 2	Rep 3	Average	SD
KD 1	0.60989	0.571274	0.578559	0.586574	0.0167528
KD 2	1.90828	2.09817	2.0912	2.03255	0.0879204

## Sheet: Figure 3d
POPA								POPC
	Rep 1	Rep 2	Rep 3	Average	SD				Rep 1	Rep 2	Rep 3	Average	SD
KD 1	2.14211	2.17436	2.15916	2.15854	0.0131749			KD 1	15.175	14.5061	15.7284	15.1365	0.499742
KD 2	3.59469	2.84897	3.09617	3.17994	0.310148			KD 2	37.3053	31.0854	36.4089	34.9332	2.74531
KD 3	6.89662	5.22043	4.57591	5.56432	0.978133			KD 3	43.5008	38.0137	35.5156	39.01	3.33521
KD 4	10.7601	7.48162	5.83901	8.02691	2.04569			KD 4	40.0812	40.5444	39.8372	40.1543	0.293265
KD 5	14.0761	11.2883	8.09355	11.1526	2.44424			KD 5	29.0388	38.2571	32.3414	33.2124	3.81341
POPE								POPG
	Rep 1	Rep 2	Rep 3	Average	SD				Rep 1	Rep 2	Rep 3	Average	SD
KD 1	8.05162	7.20715	7.33658	7.53178	0.371355			KD 1	2.74045	2.46225	2.65395	2.61888	0.116247
KD 2	21.5944	18.1221	17.1242	18.9469	1.91591			KD 2	7.64269	6.51107	7.42345	7.1924	0.490017
KD 3	30.8041	27.1233	25.5233	27.8169	2.21096			KD 3	12.2047	10.3048	9.83571	10.7817	1.02426
KD 4	36.3616	31.1497	30.4896	32.667	2.62635			KD 4	16.5191	14.8123	12.0668	14.4661	1.83403
KD 5	24.5282	25.1943	26.5797	25.434	0.854488			KD 5	17.0932	18.2612	15.1091	16.8212	1.30113
POPS								TOCDL
	Rep 1	Rep 2	Rep 3	Average	SD				Rep 1	Rep 2	Rep 3	Average	SD
KD 1	2.7326	2.13027	2.12618	2.32968	0.284908			KD 1	0.088672	0.165823	0.086784	0.11376	0.0368224
KD 2	1.96532	1.76498	1.56925	1.76652	0.1617			KD 2	0.40421	0.488174	0.407218	0.433201	0.0388914
KD 3	4.80617	5.49793	4.42307	4.90906	0.444801			KD 3	1.01792	0.982922	1.07242	1.02442	0.0368243
KD 4	6.65519	6.59052	6.74388	6.6632	0.0628668			KD 4	1.96618	2.17261	2.22313	2.12064	0.11115
KD 5	9.60711	9.20369	9.09422	9.30168	0.220553
KDL
	Rep 1	Rep 2	Rep 3	Average	SD
KD 1	0.271435	0.310082	0.302396	0.294638	0.0167041
KD 2	1.13185	1.11348	1.14693	1.13075	0.0136778

## Sheet: Figure 5c
WT untrapped							R188A K243A untrapped							R78A K299A untrapped
	Rep 1	Rep 2	Rep 3	Average	SD			Rep 1	Rep 2	Rep 3	Average	SD			Rep 1	Rep 2	Rep 3	Average	SD
KD 1	0.60989	0.571274	0.578559	0.586574	0.0167528		KD 1	1.03047	1.11402	1.07939	1.07463	0.0342779		KD 1	5.04	5.34	5.34	5.24	0.141421
KD 2	1.90828	2.09817	2.0912	2.03255	0.0879204		KD 2	8.89835	12.8667	7.4801	9.74839	2.27974		KD 2	7.74	8.28	9.07	8.36333	0.546158
WT trapped							R188A K243A trapped
	Rep 1	Rep 2	Rep 3	Average	SD			Rep 1	Rep 2	Rep 3	Average	SD
KD 1	0.271435	0.310082	0.302396	0.294638	0.0167041		KD 1	0.626833	0.75378	0.572458	0.651024	0.075975
KD 2	1.13185	1.11348	1.14693	1.13075	0.0136778		KD 2	2.24612	2.72826	2.20337	2.39258	0.238001

## Sheet: Figure 5d
	WT				R188A K243A				R78A K299A
	Apo	LRa	LA	KDL	Apo	LRa	LA	KDL	Apo	LRa	LA	KDL
Rep 1	0.0164333	0.0562667	0.0273333	0.0506667	0.0150333	0.0257333	0.0214	0.0312667	0.0183667	0.0581	0.0161	0.0208
Rep 2	0.0172	0.0584333	0.0333	0.0563	0.0141333	0.0261667	0.0195	0.0305	0.016	0.0537333	0.0186667	0.0179667
Rep 3	0.0161667	0.0610333	0.0303333	0.0555333	0.0144333	0.0233	0.0182	0.0298	0.0186667	0.0614667	0.0140667	0.0221333
Avg	0.0166
	0.98996	3.38956	1.64659	3.05221	0.905622	1.5502	1.28916	1.88353	1.10643	3.5	0.96988	1.25301
	1.03614	3.52008	2.00602	3.39157	0.851406	1.57631	1.1747	1.83735	0.963855	3.23695	1.1245	1.08233
	0.973896	3.67671	1.82731	3.34538	0.869478	1.40361	1.09639	1.79518	1.1245	3.70281	0.84739	1.33333
Avg	1	3.52878	1.82664	3.26305	0.875502	1.51004	1.18675	1.83869	1.06493	3.47992	0.980589	1.22289
SD	0.0263861	0.117389	0.146741	0.150276	0.0225401	0.0760052	0.0791582	0.0360825	0.0718478	0.190717	0.113382	0.104662
p value					0.0556794	0.00416544	0.0471998	0.00796066	0.447784	0.722546	0.0109601	0.00521473
						0.00866853						0.0185046
	Apo	LRa	LA	KDL
WT	1	3.52878	1.82664	3.26305
R188A K243A	0.875502	1.51004	1.18675	1.83869
R78A K299A	1.06493	3.47992	0.980589	1.22289

## Sheet: Supp Figure 4
	POPA
Total [P]	5e-07
	[L]	[P]	[PL1]	[PL2]	[PL3]	[PL4]	[PL5]	[PL6]	[PL7]	[PL8]
	2e-06	0.8	0.136	0.016	0	0	0.032	0.016	0	0
	4e-06	0.714286	0.221429	0.0357143	0	0	0.0214286	0.00714286	0	0
	6e-06	0.60241	0.277108	0.0662651	0.0120482	0.0060241	0.0180723	0.0120482	0.0060241	0
	8e-06	0.581395	0.290698	0.0813953	0.0174419	0.0174419	0	0	0.0116279	0
	1e-05	0.480769	0.302885	0.115385	0.0384615	0.0192308	0.0192308	0.0144231	0.00961538	0
	1.5e-05	0.275641	0.320513	0.192308	0.102564	0.0480769	0.025641	0.0192308	0.00961538	0.00641026
	2e-05	0.14532	0.246305	0.197044	0.152709	0.103448	0.0591133	0.0665025	0.0172414	0.0123153
Total [P]	5e-07
	[L]	[P]	[PL1]	[PL2]	[PL3]	[PL4]	[PL5]	[PL6]	[PL7]	[PL8]
	2e-06	0.806452	0.145161	0.016129	0	0	0.0241935	0.00806452	0	0
	4e-06	0.892857	0.0803571	0	0	0	0.0267857	0	0	0
	6e-06	0.564972	0.288136	0.0903955	0.0282486	0.0112994	0	0.0112994	0.00564972	0
	8e-06	0.621118	0.273292	0.068323	0.0124224	0	0.0186335	0.00621118	0	0
	1e-05	0.45045	0.333333	0.121622	0.036036	0.0135135	0.0135135	0.00900901	0.0135135	0.00900901
	1.5e-05	0.273016	0.31746	0.190476	0.0857143	0.0539683	0.031746	0.0285714	0.0190476	0
	2e-05	0.202346	0.293255	0.234604	0.131965	0.0674487	0.0410557	0	0.0146628	0.0146628
Total [P]	5e-07
	[L]	[P]	[PL1]	[PL2]	[PL3]	[PL4]	[PL5]	[PL6]	[PL7]	[PL8]
	2e-06	0.892857	0.0803571	0	0	0	0.0267857	0	0	0
	4e-06	0.793651	0.174603	0.015873	0	0	0.015873	0	0	0
	6e-06	0.704225	0.197183	0.0352113	0.00704225	0.00704225	0.028169	0.0140845	0.00704225	0
	8e-06	0.625	0.26875	0.0625	0.0125	0	0.01875	0.0125	0	0
	1e-05	0.49505	0.316832	0.113861	0.029703	0.00990099	0.00990099	0.0148515	0.00990099	0
	1.5e-05	0.325503	0.33557	0.197987	0.0838926	0.0369128	0	0.00671141	0.00671141	0.00671141
	2e-05	0.167539	0.26178	0.235602	0.149215	0.0811518	0.0471204	0.0287958	0.0209424	0.0078534
	POPC
Total [P]	5e-07
	[L]	[P]	[PL1]	[PL2]	[PL3]	[PL4]	[PL5]	[PL6]
	2e-06	0.819672	0.114754	0.0163934	0	0.0491803	0	0
	4e-06	0.70922	0.198582	0.0425532	0.0141844	0.035461	0	0
	6e-06	0.671141	0.228188	0.0536913	0.00671141	0.033557	0.00671141	0
	8e-06	0.584795	0.251462	0.0877193	0.0292398	0.0350877	0.0116959	0
	1e-05	0.531915	0.276596	0.101064	0.0425532	0.0319149	0.0159574	0
	1.5e-05	0.5	0.255	0.11	0.07	0.03	0.02	0.015
	2e-05	0.460829	0.294931	0.133641	0.0599078	0.0184332	0.0230415	0.00921659
Total [P]	5e-07
	[L]	[P]	[PL1]	[PL2]	[PL3]	[PL4]	[PL5]	[PL6]
	2e-06	0.813008	0.113821	0.0162602	0	0.0569106	0	0
	4e-06	0.8	0.128	0.024	0	0.048	0	0
	6e-06	0.645161	0.225806	0.0645161	0.0129032	0.0387097	0.0129032	0
	8e-06	0.75188	0.218045	0.0300752	0	0	0	0
	1e-05	0.568182	0.278409	0.0909091	0.0227273	0.0284091	0.0113636	0
	1.5e-05	0.529101	0.269841	0.100529	0.0740741	0.015873	0	0.010582
	2e-05	0.436681	0.318777	0.144105	0.0436681	0.0262009	0.0218341	0.00873362
Total [P]	5e-07
	[L]	[P]	[PL1]	[PL2]	[PL3]	[PL4]	[PL5]	[PL6]
	2e-06	0.826446	0.123967	0.00826446	0	0.0413223	0	0
	4e-06	0.78125	0.140625	0.015625	0	0.046875	0.015625	0
	6e-06	0.714286	0.2	0.0357143	0	0.0428571	0.00714286	0
	8e-06	0.617284	0.253086	0.0802469	0.0246914	0.0185185	0.00617284	0
	1e-05	0.552486	0.265193	0.0939227	0.038674	0.0331492	0.0110497	0.00552486
	1.5e-05	0.540541	0.291892	0.102703	0.0324324	0.0162162	0.0108108	0.00540541
	2e-05	0.462963	0.296296	0.125	0.0509259	0.0324074	0.0231481	0.00925926
	POPE
Total [P]	5e-07
	[L]	[P]	[PL1]	[PL2]	[PL3]	[PL4]	[PL5]	[PL6]	[PL7]	[PL8]
	2e-06	0.854701	0.128205	0.017094	0	0	0	0	0	0
	4e-06	0.793651	0.18254	0.0238095	0	0	0	0	0	0
	6e-06	0.578035	0.300578	0.0924855	0.0231214	0.00578035	0	0	0	0
	8e-06	0.3861	0.285714	0.177606	0.0656371	0.034749	0.019305	0.011583	0.011583	0.00772201
	1e-05	0.497512	0.333333	0.124378	0.0348259	0.00995025	0	0	0	0
	1.5e-05	0.268097	0.262735	0.182306	0.115282	0.077748	0.0509383	0.0268097	0.0134048	0.00268097
	2e-05	0.229314	0.236407	0.172577	0.125296	0.0921986	0.0661939	0.0425532	0.0236407	0.0118203
Total [P]	5e-07
	[L]	[P]	[PL1]	[PL2]	[PL3]	[PL4]	[PL5]	[PL6]	[PL7]	[PL8]
	2e-06	0.793651	0.174603	0.0238095	0.00793651	0	0	0	0	0
	4e-06	0.671141	0.241611	0.0604027	0.0201342	0.00671141	0	0	0	0
	6e-06	0.588235	0.294118	0.0882353	0.0235294	0.00588235	0	0	0	0
	8e-06	0.537634	0.290323	0.107527	0.0268817	0.0107527	0.0107527	0.00537634	0.0107527	0
	1e-05	0.492611	0.26601	0.133005	0.0541872	0.0246305	0.0197044	0.00985222	0	0
	1.5e-05	0.350877	0.322807	0.182456	0.0807018	0.0350877	0.0140351	0.00701754	0.00701754	0
	2e-05	0.291176	0.294118	0.2	0.117647	0.0529412	0.0235294	0.0117647	0.00882353	0
Total [P]	5e-07
	[L]	[P]	[PL1]	[PL2]	[PL3]	[PL4]	[PL5]	[PL6]	[PL7]	[PL8]
	2e-06	0.775194	0.186047	0.0310078	0.00775194	0	0	0	0	0
	4e-06	0.699301	0.216783	0.048951	0.013986	0.00699301	0.00699301	0.00699301	0	0
	6e-06	0.46729	0.299065	0.116822	0.0607477	0.0186916	0.0140187	0.0140187	0.00934579	0
	8e-06	0.487805	0.312195	0.131707	0.0439024	0.0195122	0.00487805	0	0	0
	1e-05	0.462963	0.314815	0.125	0.0555556	0.0231481	0.00462963	0.00925926	0.00462963	0
	1.5e-05	0.392157	0.305882	0.160784	0.0705882	0.0392157	0.0156863	0.0117647	0.00392157	0
	2e-05	0.277008	0.277008	0.171745	0.099723	0.066482	0.0443213	0.0277008	0.0249307	0.0110803
	POPG
Total [P]	5e-07
	[L]	[P]	[PL1]	[PL2]	[PL3]	[PL4]	[PL5]	[PL6]	[PL7]
	2e-06	0.561798	0.308989	0.101124	0.0280899	0	0	0	0
	4e-06	0.4329	0.285714	0.151515	0.0822511	0.047619	0	0	0
	6e-06	0.373134	0.287313	0.160448	0.0858209	0.0522388	0.0261194	0.0149254	0
	8e-06	0.224852	0.295858	0.233728	0.136095	0.0680473	0.0295858	0.0118343	0
	1e-05	0.213699	0.273973	0.208219	0.126027	0.0849315	0.0520548	0.0410959	0
	1.5e-05	0.0847458	0.182203	0.211864	0.199153	0.150424	0.0847458	0.0572034	0.029661
	2e-05	0.103814	0.199153	0.211864	0.20339	0.127119	0.0868644	0.0423729	0.0254237
Total [P]	5e-07
	[L]	[P]	[PL1]	[PL2]	[PL3]	[PL4]	[PL5]	[PL6]	[PL7]
	2e-06	0.49505	0.316832	0.143564	0.0445545	0	0	0	0
	4e-06	0.480769	0.341346	0.129808	0.0432692	0	0	0.00480769	0
	6e-06	0.359712	0.320144	0.190647	0.0863309	0.0431655	0	0	0
	8e-06	0.248503	0.299401	0.218563	0.125749	0.0658683	0.0419162	0	0
	1e-05	0.222552	0.296736	0.237389	0.127596	0.0682493	0.0326409	0.0148368	0
	1.5e-05	0.122642	0.235849	0.231132	0.174528	0.110849	0.0660377	0.0377358	0.0212264
	2e-05	0.0956341	0.203742	0.2079	0.182952	0.133056	0.0852391	0.0602911	0.031185
Total [P]	5e-07	0	0	0	0	0	0	0	0
	[L]	[P]	[PL1]	[PL2]	[PL3]	[PL4]	[PL5]	[PL6]	[PL7]
	2e-06	0.621118	0.285714	0.0745342	0.0186335	0	0	0	0
	4e-06	0.510204	0.341837	0.117347	0.0306122	0	0	0	0
	6e-06	0.406504	0.345528	0.170732	0.0569106	0.0203252	0	0	0
	8e-06	0.273775	0.288184	0.195965	0.106628	0.0605187	0.0345821	0.0230548	0.0172911
	1e-05	0.209169	0.286533	0.229226	0.13467	0.0744986	0.0429799	0.0229226	0
	1.5e-05	0.145631	0.242718	0.242718	0.17233	0.11165	0.0582524	0.026699	0
	2e-05	0.0990099	0.194059	0.19802	0.166337	0.136634	0.10297	0.0693069	0.0336634
	POPS
Total [P]
	[L]	[P]	[PL1]	[PL2]	[PL3]	[PL4]	[PL5]	[PL6]	[PL7]	[PL8]	[PL9]	[PL10]
	2e-06	0.502513	0.306533	0.105528	0.0201005	0.040201	0.0100503	0.00502513	0.00502513	0	0	0.00502513
	4e-06	0.326797	0.303922	0.196078	0.0980392	0.0359477	0.0228758	0.00326797	0.00980392	0.00326797	0	0
	6e-06	0.289017	0.280347	0.190751	0.106936	0.0520231	0.0346821	0.017341	0.0144509	0.0144509	0	0
	8e-06	0.240964	0.301205	0.213855	0.120482	0.060241	0.0240964	0.0180723	0.0180723	0.00301205	0	0
	1e-05	0.180758	0.291545	0.241983	0.148688	0.0728863	0.0262391	0.0174927	0.0145773	0.0058309	0	0
	1.5e-05	0.113821	0.193089	0.203252	0.186992	0.132114	0.0792683	0.0426829	0.0345528	0.0101626	0.00406504	0
	2e-05	0.0219595	0.0777027	0.128378	0.163851	0.168919	0.152027	0.123311	0.0827703	0.0456081	0.0253378	0.0101351
Total [P]	5e-07
	[L]	[P]	[PL1]	[PL2]	[PL3]	[PL4]	[PL5]	[PL6]	[PL7]	[PL8]	[PL9]	[PL10]
	2e-06	0.581395	0.290698	0.0813953	0.0174419	0.00581395	0.0174419	0.00581395	0	0	0	0
	4e-06	0.371747	0.289963	0.178439	0.070632	0.0185874	0.0223048	0.0148699	0.0223048	0.00743494	0	0.00371747
	6e-06	0.244373	0.321543	0.228296	0.115756	0.0353698	0.0192926	0.0160772	0.0128617	0.00643087	0	0
	8e-06	0.244514	0.31348	0.219436	0.122257	0.0376176	0.0282132	0.0125392	0.015674	0.00626959	0	0
	1e-05	0.167116	0.269542	0.215633	0.140162	0.0754717	0.0431267	0.0269542	0.032345	0.0215633	0	0.00808625
	1.5e-05	0.0956938	0.208134	0.239234	0.184211	0.119617	0.0598086	0.0406699	0.0263158	0.0167464	0.00717703	0.00239234
	2e-05	0.0441696	0.116608	0.169611	0.176678	0.15371	0.127208	0.0954064	0.0671378	0.0335689	0.0106007	0.00530035
Total [P]	5e-07
	[L]	[P]	[PL1]	[PL2]	[PL3]	[PL4]	[PL5]	[PL6]	[PL7]	[PL8]	[PL9]	[PL10]
	2e-06	0.568182	0.295455	0.0795455	0.0170455	0.0284091	0.0113636	0	0	0	0	0
	4e-06	0.330033	0.30033	0.174917	0.0891089	0.0363036	0	0.019802	0.0363036	0.00660066	0	0.00660066
	6e-06	0.266447	0.328947	0.226974	0.101974	0.0263158	0.0197368	0.0164474	0.0131579	0	0	0
	8e-06	0.237179	0.320513	0.233974	0.13141	0.0448718	0	0.0224359	0.00961538	0	0	0
	1e-05	0.168	0.266667	0.221333	0.141333	0.0746667	0.04	0.0346667	0.0266667	0.0133333	0.008	0.00533333
	1.5e-05	0.134969	0.179959	0.204499	0.182004	0.114519	0.0797546	0.0531697	0.0368098	0.00408998	0	0.0102249
	2e-05	0.047619	0.115079	0.18254	0.198413	0.162698	0.117063	0.0813492	0.0535714	0.0277778	0.0138889	0
	TOCDL
Total [P]	5e-07
	[L]	[P]	[PL1]	[PL2]	[PL3]	[PL4]	[PL5]	[PL6]
	1e-07	0.961538	0.0384615	0	0	0	0	0
	2e-07	0.900901	0.0990991	0	0	0	0	0
	4e-07	0.813008	0.162602	0.0243902	0	0	0	0
	6e-07	0.793651	0.15873	0.015873	0.00793651	0	0.00793651	0.015873
	8e-07	0.694444	0.215278	0.0277778	0.0138889	0.0138889	0.0208333	0.0138889
	1e-06	0.680272	0.258503	0.047619	0.00680272	0	0	0.00680272
	2e-06	0.389105	0.342412	0.163424	0.0700389	0.0194553	0.0077821	0.0077821
	4e-06	0.150418	0.278552	0.256267	0.178273	0.0947075	0.0250696	0.0167131
	6e-06	0.11399	0.227979	0.259067	0.19171	0.124352	0.0621762	0.0207254
Total [P]	5e-07
	[L]	[P]	[PL1]	[PL2]	[PL3]	[PL4]	[PL5]	[PL6]
	1e-07	0.943396	0.0566038	0	0	0	0	0
	2e-07	0.934579	0.0654206	0	0	0	0	0
	4e-07	0.847458	0.127119	0.0169492	0.00847458	0	0	0
	6e-07	0.775194	0.155039	0.0310078	0.0155039	0	0.0155039	0.00775194
	8e-07	0.746269	0.216418	0.0373134	0	0	0	0
	1e-06	0.628931	0.289308	0.0691824	0.0125786	0	0	0
	2e-06	0.442478	0.353982	0.150442	0.039823	0.0132743	0	0
	4e-06	0.232026	0.326797	0.254902	0.130719	0.0522876	0.00326797	0
	6e-06	0.141667	0.277778	0.277778	0.172222	0.0916667	0.025	0.0138889
Total [P]	5e-07
	[L]	[P]	[PL1]	[PL2]	[PL3]	[PL4]	[PL5]	[PL6]
	1e-07	0.961538	0.0384615	0	0	0	0	0
	2e-07	0.900901	0.0810811	0.00900901	0.00900901	0	0	0
	4e-07	0.862069	0.12069	0.0172414	0	0	0	0
	6e-07	0.775194	0.193798	0.0310078	0	0	0	0
	8e-07	0.719424	0.23741	0.0431655	0	0	0	0
	1e-06	0.657895	0.276316	0.0592105	0.00657895	0	0	0
	2e-06	0.49505	0.336634	0.128713	0.0346535	0.0049505	0	0
	4e-06	0.214286	0.324675	0.246753	0.146104	0.0616883	0.00649351	0
	6e-06	0.242967	0.255754	0.214834	0.161125	0.0664962	0.0383632	0.0204604
	KDL
Total [P]	5e-07
	[L]	[P]	[PL1]	[PL2]	[PL3]	[PL4]	[PL5]
	2e-07	0.78125	0.195312	0.0234375	0	0	0
	4e-07	0.75188	0.210526	0.0225564	0	0	0.0150376
	6e-07	0.675676	0.283784	0.0405405	0	0	0
	8e-07	0.534759	0.336898	0.101604	0.0106952	0.0160428	0
	1e-06	0.520833	0.369792	0.0989583	0.0104167	0	0
	2e-06	0.0576923	0.227564	0.320513	0.230769	0.108974	0.0544872
	4e-06	0.165333	0.266667	0.237333	0.186667	0.109333	0.0346667
Total [P]	5e-07
	[L]	[P]	[PL1]	[PL2]	[PL3]	[PL4]	[PL5]
	2e-07	0.769231	0.215385	0.0153846	0	0	0
	4e-07	0.775194	0.209302	0.0155039	0	0	0
	6e-07	0.653595	0.287582	0.0392157	0.00653595	0.00653595	0.00653595
	8e-07	0.537634	0.365591	0.0967742	0	0	0
	1e-06	0.529101	0.375661	0.0740741	0	0.015873	0.00529101
	2e-06	0.270758	0.361011	0.245487	0.0938628	0.0252708	0.00361011
	4e-06	0.0442478	0.182891	0.294985	0.280236	0.147493	0.0501475
Total [P]	5e-07
	[L]	[P]	[PL1]	[PL2]	[PL3]	[PL4]	[PL5]
	2e-07	0.806452	0.177419	0.016129	0	0	0
	4e-07	0.787402	0.188976	0.023622	0	0	0
	6e-07	0.684932	0.267123	0.0479452	0	0	0
	8e-07	0.534759	0.363636	0.0909091	0.00534759	0	0.00534759
	1e-06	0.561798	0.353933	0.0842697	0	0	0
	2e-06	0.27027	0.3861	0.266409	0.0772201	0	0
	4e-06	0.106322	0.218391	0.287356	0.227011	0.143678	0.0172414

## Sheet: Supp Figure 6
	POPA
Total [P]	5e-07
	[L]	[P]	[PL1]	[PL2]	[PL3]	[PL4]	[PL5]	[PL6]	[PL7]	[PL8]
	2e-06	0.578512	0.342975	0.0743802	0.00413223	0	0	0	0	0
	3e-06	0.376623	0.394805	0.174026	0.0467532	0.00779221	0	0	0	0
	4e-06	0.272016	0.395303	0.228963	0.0821918	0.0215264	0	0	0	0
	5e-06	0.212803	0.373702	0.254325	0.112457	0.0363322	0.0103806	0	0	0
	6e-06	0.134812	0.300341	0.278157	0.172355	0.0802048	0.0238908	0.0102389	0	0
	7e-06	0.1088	0.2704	0.2816	0.1888	0.1008	0.0384	0.0112	0	0
	8e-06	0.0723077	0.213846	0.261538	0.212308	0.133846	0.0661538	0.0276923	0.00923077	0.00307692
Total [P]	5e-07
	[L]	[P]	[PL1]	[PL2]	[PL3]	[PL4]	[PL5]	[PL6]	[PL7]	[PL8]
	2e-06	0.605809	0.327801	0.06639	0	0	0	0	0	0
	3e-06	0.385965	0.380952	0.152882	0.0401003	0.0100251	0.00501253	0.0100251	0.00501253	0.0100251
	4e-06	0.251748	0.374126	0.234266	0.0874126	0.0367133	0.00174825	0.00699301	0.0034965	0.0034965
	5e-06	0.208539	0.374384	0.2578	0.111658	0.0377668	0.00985222	0	0	0
	6e-06	0.13879	0.309609	0.27758	0.16548	0.0765125	0.0266904	0.00533808	0	0
	7e-06	0.0692194	0.209131	0.265096	0.220913	0.135493	0.0662739	0.0235641	0.00883652	0.00147275
	8e-06	0.070229	0.210687	0.265649	0.210687	0.135878	0.0671756	0.0290076	0.00763359	0.00305344
Total [P]	5e-07
	[L]	[P]	[PL1]	[PL2]	[PL3]	[PL4]	[PL5]	[PL6]	[PL7]	[PL8]
	2e-06	0.596708	0.329218	0.0699588	0.00411523	0	0	0	0	0
	3e-06	0.393531	0.407008	0.156334	0.0377358	0.00539084	0	0	0	0
	4e-06	0.218391	0.382184	0.248563	0.0890805	0.0287356	0.00862069	0.0114943	0.00574713	0.00718391
	5e-06	0.208481	0.367491	0.259717	0.114841	0.040636	0.00883392	0	0	0
	6e-06	0.145719	0.31694	0.273224	0.160291	0.0728597	0.0255009	0.00546448	0	0
	7e-06	0.0877483	0.236755	0.278146	0.198675	0.115894	0.0529801	0.0215232	0.00496689	0.00331126
	8e-06	0.0749601	0.215311	0.271132	0.207337	0.133971	0.062201	0.0239234	0.0111643	0
	POPC
Total [P]	5e-07
	[L]	[P]	[PL1]	[PL2]	[PL3]	[PL4]	[PL5]
	2e-06	0.890511	0.109489	0	0	0	0
	4e-06	0.780488	0.20122	0.0182927	0	0	0
	6e-06	0.747126	0.229885	0.0229885	0	0	0
	8e-06	0.540773	0.287554	0.107296	0.0386266	0.00858369	0.0171674
	1e-05	0.58371	0.316742	0.0904977	0.00904977	0	0
	1.5e-05	0.357341	0.360111	0.185596	0.0692521	0.0221607	0.00554017
	2e-05	0.360111	0.357341	0.182825	0.066482	0.0277008	0.00554017
Total [P]	5e-07
	[L]	[P]	[PL1]	[PL2]	[PL3]	[PL4]	[PL5]
	2e-06	0.917293	0.0827068	0	0	0	0
	4e-06	0.786585	0.182927	0.0304878	0	0	0
	6e-06	0.739884	0.225434	0.0346821	0	0	0
	8e-06	0.663265	0.285714	0.0510204	0	0	0
	1e-05	0.584821	0.325893	0.0848214	0.00446429	0	0
	1.5e-05	0.415842	0.363036	0.158416	0.0528053	0.00990099	0
	2e-05	0.291391	0.342163	0.214128	0.0971302	0.0375276	0.01766
Total [P]	5e-07
	[L]	[P]	[PL1]	[PL2]	[PL3]	[PL4]	[PL5]
	2e-06	0.932331	0.0676692	0	0	0	0
	4e-06	0.835526	0.151316	0.0131579	0	0	0
	6e-06	0.757396	0.218935	0.0236686	0	0	0
	8e-06	0.566524	0.32618	0.0987124	0.00858369	0	0
	1e-05	0.536885	0.336066	0.102459	0.0245902	0	0
	1.5e-05	0.424749	0.35786	0.157191	0.0501672	0.0100334	0
	2e-05	0.361644	0.369863	0.178082	0.0657534	0.0246575	0
	POPE
Total [P]	5e-07
	[L]	[P]	[PL1]	[PL2]	[PL3]	[PL4]	[PL5]	[PL6]	[PL7]	[PL8]
	2e-06	0.693878	0.255102	0.0459184	0.00510204	0	0	0	0	0
	4e-06	0.599119	0.312775	0.0792952	0.00881057	0	0	0	0	0
	6e-06	0.511194	0.354478	0.11194	0.0223881	0	0	0	0	0
	8e-06	0.406627	0.379518	0.156627	0.0481928	0.00903614	0	0	0	0
	1e-05	0.321513	0.368794	0.196217	0.0780142	0.0260047	0.00945626	0	0	0
	1.5e-05	0.215168	0.33157	0.238095	0.123457	0.0564374	0.0246914	0.00881834	0.00176367	0
	2e-05	0.124339	0.256614	0.243386	0.171958	0.10582	0.0542328	0.0277778	0.0119048	0.00396825
Total [P]	5e-07
	[L]	[P]	[PL1]	[PL2]	[PL3]	[PL4]	[PL5]	[PL6]	[PL7]	[PL8]
	2e-06	0.698925	0.241935	0.0537634	0.00537634	0	0	0	0	0
	4e-06	0.6	0.315556	0.0755556	0.00888889	0	0	0	0	0
	6e-06	0.496429	0.364286	0.117857	0.0214286	0	0	0	0	0
	8e-06	0.358974	0.382051	0.179487	0.0589744	0.0205128	0	0	0	0
	1e-05	0.278226	0.346774	0.209677	0.0947581	0.0423387	0.0181452	0.0100806	0	0
	1.5e-05	0.216912	0.345588	0.237132	0.125	0.0514706	0.0165441	0.00735294	0	0
	2e-05	0.134503	0.280702	0.247076	0.160819	0.0964912	0.0453216	0.0248538	0.00877193	0.00146199
Total [P]	5e-07
	[L]	[P]	[PL1]	[PL2]	[PL3]	[PL4]	[PL5]	[PL6]	[PL7]	[PL8]
	2e-06	0.77907	0.203488	0.0174419	0	0	0	0	0	0
	4e-06	0.64455	0.2891	0.0616114	0.00473934	0	0	0	0	0
	6e-06	0.456954	0.357616	0.135762	0.0430464	0.00662252	0	0	0	0
	8e-06	0.35369	0.35369	0.185751	0.0712468	0.0254453	0.0101781	0	0	0
	1e-05	0.315294	0.367059	0.202353	0.08	0.0258824	0.00941176	0	0	0
	1.5e-05	0.2	0.333913	0.241739	0.132174	0.0591304	0.0208696	0.0121739	0	0
	2e-05	0.144838	0.286595	0.25886	0.164869	0.0878274	0.0385208	0.0154083	0.00308166	0
	POPG
Total [P]	5e-07
	[L]	[P]	[PL1]	[PL2]	[PL3]	[PL4]	[PL5]	[PL6]	[PL7]	[PL8]	[PL9]	[PL10]
	2e-06	0.622807	0.302632	0.0701754	0.00438596	0	0	0	0	0	0	0
	4e-06	0.421687	0.385542	0.14759	0.0391566	0.0060241	0	0	0	0	0	0
	6e-06	0.313901	0.383408	0.206278	0.0762332	0.0201794	0	0	0	0	0	0
	8e-06	0.214159	0.353982	0.240708	0.122124	0.0477876	0.0176991	0.00353982	0	0	0	0
	1e-05	0.150915	0.301829	0.272866	0.152439	0.0746951	0.0259146	0.0152439	0	0.00609756	0	0
	1.5e-05	0.0544379	0.169231	0.229586	0.20355	0.151479	0.0970414	0.0579882	0.0236686	0.0106509	0.00236686	0
	2e-05	0.0345178	0.117766	0.184772	0.185787	0.162437	0.119797	0.0852792	0.0538071	0.0253807	0.0101523	0.0203046
Total [P]	5e-07
	[L]	[P]	[PL1]	[PL2]	[PL3]	[PL4]	[PL5]	[PL6]	[PL7]	[PL8]	[PL9]	[PL10]
	2e-06	0.631818	0.3	0.0636364	0.00454545	0	0	0	0	0	0	0
	4e-06	0.445545	0.379538	0.135314	0.0363036	0.00330033	0	0	0	0	0	0
	6e-06	0.293996	0.376812	0.213251	0.0848861	0.0269151	0.00414079	0	0	0	0	0
	8e-06	0.208872	0.354898	0.249538	0.112754	0.051756	0.0147874	0.00739372	0	0	0	0
	1e-05	0.154745	0.321168	0.255474	0.148905	0.0686131	0.0248175	0.0116788	0.00583942	0.00583942	0	0.00291971
	1.5e-05	0.0720109	0.206522	0.247283	0.209239	0.13587	0.0733696	0.0353261	0.0163043	0.00407609	0	0
	2e-05	0.0329787	0.131915	0.195745	0.194681	0.168085	0.12234	0.0734043	0.0414894	0.0202128	0.0106383	0.00851064
Total [P]	5e-07
	[L]	[P]	[PL1]	[PL2]	[PL3]	[PL4]	[PL5]	[PL6]	[PL7]	[PL8]	[PL9]	[PL10]
	2e-06	0.665094	0.283019	0.0518868	0	0	0	0	0	0	0	0
	4e-06	0.438486	0.378549	0.14511	0.0315457	0.00630915	0	0	0	0	0	0
	6e-06	0.303879	0.385776	0.204741	0.0732759	0.0280172	0.00431034	0	0	0	0	0
	8e-06	0.195205	0.35274	0.246575	0.131849	0.0513699	0.0188356	0.00342466	0	0	0	0
	1e-05	0.182137	0.336252	0.260946	0.134851	0.061296	0.0210158	0.00350263	0	0	0	0
	1.5e-05	0.0654321	0.203704	0.241975	0.206173	0.140741	0.0753086	0.037037	0.017284	0.0123457	0	0
	2e-05	0.0331551	0.124064	0.192513	0.203209	0.171123	0.117647	0.0791444	0.0417112	0.0203209	0.0106952	0.00641711
	POPS
Total [P]	5e-07
	[L]	[P]	[PL1]	[PL2]	[PL3]	[PL4]	[PL5]	[PL6]	[PL7]	[PL8]	[PL9]	[PL10]
	1e-06	0.808989	0.157303	0.0337079	0	0	0	0	0	0	0	0
	2e-06	0.576419	0.257642	0.131004	0.0349345	0	0	0	0	0	0	0
	4e-06	0.356546	0.29805	0.211699	0.100279	0.0278552	0.00557103	0	0	0	0	0
	6e-06	0.185886	0.275387	0.242685	0.172117	0.0826162	0.0309811	0.010327	0	0	0	0
	8e-06	0.126888	0.241692	0.23716	0.190332	0.122356	0.0543807	0.0181269	0.0060423	0.00302115	0	0
	1e-05	0.0625	0.154605	0.20614	0.201754	0.162281	0.105263	0.058114	0.0339912	0.0109649	0.00438596	0
	1.5e-05	0.0365985	0.11733	0.172228	0.189451	0.170075	0.13563	0.0904198	0.0538213	0.0258342	0.00861141	0
Total [P]	5e-07
	[L]	[P]	[PL1]	[PL2]	[PL3]	[PL4]	[PL5]	[PL6]	[PL7]	[PL8]	[PL9]	[PL10]
	1e-06	0.817647	0.147059	0.0352941	0	0	0	0	0	0	0	0
	2e-06	0.573276	0.262931	0.12931	0.0344828	0	0	0	0	0	0	0
	4e-06	0.353591	0.30663	0.20442	0.10221	0.0276243	0.00552486	0	0	0	0	0
	6e-06	0.182948	0.277087	0.243339	0.172291	0.0852575	0.0319716	0.0071048	0	0	0	0
	8e-06	0.130971	0.252696	0.251156	0.187982	0.106317	0.0446841	0.0169492	0.00616333	0.00308166	0	0
	1e-05	0.0641774	0.163361	0.212369	0.204201	0.161027	0.105018	0.0525088	0.0256709	0.00933489	0.00233372	0
	1.5e-05	0.0394144	0.123874	0.177928	0.192568	0.168919	0.130631	0.0855856	0.0472973	0.0202703	0.00675676	0.00675676
Total [P]	5e-07
	[L]	[P]	[PL1]	[PL2]	[PL3]	[PL4]	[PL5]	[PL6]	[PL7]	[PL8]	[PL9]	[PL10]
	1e-06	0.79558	0.171271	0.0331492	0	0	0	0	0	0	0	0
	2e-06	0.568966	0.258621	0.137931	0.0344828	0	0	0	0	0	0	0
	4e-06	0.349727	0.300546	0.20765	0.103825	0.0273224	0.010929	0	0	0	0	0
	6e-06	0.216822	0.280374	0.237383	0.158879	0.0728972	0.0261682	0.00747664	0	0	0	0
	8e-06	0.151961	0.261438	0.25	0.176471	0.101307	0.0424837	0.0130719	0.00326797	0	0	0
	1e-05	0.092545	0.200514	0.231362	0.199229	0.141388	0.0784062	0.0359897	0.0128535	0.00514139	0.00257069	0
	1.5e-05	0.0331551	0.109091	0.171123	0.183957	0.17754	0.13369	0.0930481	0.0545455	0.026738	0.0106952	0.00641711
	TOCDL
Total [P]	5e-07
	[L]	[P]	[PL1]	[PL2]	[PL3]	[PL4]	[PL5]
	2e-07	0.909091	0.0757576	0.0151515	0	0	0
	4e-07	0.843537	0.14966	0.00680272	0	0	0
	6e-07	0.770186	0.21118	0.0186335	0	0	0
	8e-07	0.646154	0.287179	0.0615385	0.00512821	0	0
	1e-06	0.625616	0.29064	0.0738916	0.00985222	0	0
	2e-06	0.336066	0.363388	0.193989	0.0737705	0.0327869	0
	3e-06	0.223476	0.3386	0.241535	0.130926	0.0541761	0.0112867
Total [P]	5e-07
	[L]	[P]	[PL1]	[PL2]	[PL3]	[PL4]	[PL5]
	2e-07	0.909091	0.0909091	0	0	0	0
	4e-07	0.853147	0.13986	0.00699301	0	0	0
	6e-07	0.777778	0.203704	0.0185185	0	0	0
	8e-07	0.695402	0.252874	0.0517241	0	0	0
	1e-06	0.640625	0.286458	0.0677083	0.00520833	0	0
	2e-06	0.34026	0.368831	0.187013	0.0805195	0.0233766	0
	3e-06	0.201942	0.337864	0.248544	0.137864	0.0660194	0.00776699
Total [P]	5e-07
	[L]	[P]	[PL1]	[PL2]	[PL3]	[PL4]	[PL5]
	2e-07	0.89781	0.0948905	0.00729927	0	0	0
	4e-07	0.83871	0.148387	0.0129032	0	0	0
	6e-07	0.794872	0.192308	0.0128205	0	0	0
	8e-07	0.721893	0.236686	0.0414201	0	0	0
	1e-06	0.609756	0.302439	0.0682927	0.0195122	0	0
	2e-06	0.377246	0.356287	0.179641	0.0628743	0.0239521	0
	3e-06	0.237136	0.33557	0.239374	0.120805	0.0514541	0.01566
	KDL
Total [P]	4.31e-07
	[L]	[P]	[PL1]	[PL2]
	1e-07	0.863905	0.130178	0.00591716
	2e-07	0.821622	0.172973	0.00540541
	3e-07	0.784946	0.204301	0.0107527
	4e-07	0.725118	0.255924	0.0189573
	5e-07	0.616	0.332	0.052
	6e-07	0.53405	0.383513	0.0824373
	7e-07	0.510067	0.392617	0.0973154
Total [P]	4.31e-07
	[L]	[P]	[PL1]	[PL2]
	1e-07	0.843023	0.156977	0
	2e-07	0.805405	0.183784	0.0108108
	3e-07	0.75	0.234375	0.015625
	4e-07	0.70202	0.272727	0.0252525
	5e-07	0.622318	0.32618	0.0515021
	6e-07	0.540146	0.375912	0.0839416
	7e-07	0.517857	0.4	0.0821429
Total [P]	4.31e-07
	[L]	[P]	[PL1]	[PL2]
	1e-07	0.85119	0.14881	0
	2e-07	0.793296	0.195531	0.0111732
	3e-07	0.780749	0.208556	0.0106952
	4e-07	0.73399	0.246305	0.0197044
	5e-07	0.606557	0.340164	0.0532787
	6e-07	0.514184	0.404255	0.0815603
	7e-07	0.515679	0.397213	0.087108

## Sheet: Supp Figure 7
WT partial Cu									WT full Cu
	POPA	POPC	POPE	POPG	POPS	TOCDL	KDL			POPA	POPC	POPE	POPG	POPS	TOCDL	KDL
Kd1	14.684	20.399	12.393	4.881	3.642	1.929	0.878		Kd1	2.624	17.202	7.361	4.096	3.731	1.648	0.587
Kd2	23.157	39.482	23.931	11.054	8.816	4.263	1.972		Kd2	5.691	33.648	18.424	10.477	5.663	2.948	2.033
Kd3	28.503	46.031	31.517	17.397	14.656	6.691			Kd3	8.485	48.5	27.779	16.225	9.276	4.102
Kd4	30.82	46.951	32.451	23.127	20.221	9.426			Kd4	10.493	53.746	33.107	20.615	12.963	5.057
Kd5	32.618		33.72	27.112	22.176				Kd5	13.985		39.79	25.397	16.843
WT partial Cu (SD)	POPA	POPC	POPE	POPG	POPS	TOCDL	KDL		WT full Cu (SD)	POPA	POPC	POPE	POPG	POPS	TOCDL	KDL
Kd1	1.471	1.35	0.657	0.437	0.173	0.138	0.081		Kd1	0.044	0.615	0.275	0.096	0.036	0.078	0.017
Kd2	0.607	2.037	2.377	0.805	0.05	0.691	0.425		Kd2	0.127	1.266	0.665	0.209	0.208	0.094	0.088
Kd3	2.738	4.552	3.54	1.663	0.494	0.883			Kd3	0.275	4.055	0.505	0.342	0.555	0.229
Kd4	2.739	9.431	6.516	0.555	1.337	1.506			Kd4	0.367	4.927	1.957	0.733	0.407	0.226
Kd5	1.907		6.914	0.926	1.088				Kd5	0.511		3.197	1.089	0.45
ΔKd									SD
	POPA	POPC	POPE	POPG	POPS	TOCDL	KDL			POPA	POPC	POPE	POPG	POPS	TOCDL	KDL
Kd1	-12.06	-3.197	-5.032	-0.785	0.089	-0.281	-0.291		Kd1	1.47166	1.48348	0.712232	0.44742	0.176706	0.158518	0.0827647
Kd2	-17.466	-5.834	-5.507	-0.577	-3.153	-1.315	0.061		Kd2	0.620144	2.39836	2.46827	0.831689	0.213925	0.697364	0.434015
Kd3	-20.018	2.469	-3.738	-1.172	-5.38	-2.589			Kd3	2.75178	6.09621	3.57584	1.6978	0.743008	0.912212
Kd4	-20.327	6.795	0.656	-2.512	-7.258	-4.369			Kd4	2.76348	10.6404	6.80354	0.91941	1.39758	1.52286
Kd5	-18.633		6.07	-1.715	-5.333				Kd5	1.97428		7.61736	1.42947	1.17739

## Sheet: Supp Figure 8
	WT		MsbA ΔN
	Apo	w/ KDL	Apo	w/ KDL			MsbA WT	MsbA ΔN
	0.0242667	0.0643667	0.0268667	0.0605667			1.247	1.132
	0.0242333	0.065	0.0278667	0.0600333			1.237	1.206
	0.0255333	0.0652333	0.0248333	0.0604			1.253	1.205
Average	0.0246778					Average	1.24567	1.181
	0.983341	2.60828	1.0887	2.4543			MsbA WT	MsbA ΔN
	0.98199	2.63395	1.12922	2.43269			1.00107	0.90875
	1.03467	2.6434	1.0063	2.44755			0.993043	0.968156
							1.00589	0.967353
Avgerage	1	2.62855	1.07474	2.44484		Std	0.0052981	0.0278169
Std	0.0245209	0.0148377	0.0511423	0.00902744

## Sheet: Supp Figure 13
	POPA
Total [P]	3.59e-07
	[L]	[P]	[PL1]	[PL2]	[PL3]	[PL4]	[PL5]	[PL6]
	2e-06	0.620301	0.319549	0.0601504	0	0	0	0
	3e-06	0.0831461	0.310112	0.361798	0.178652	0.0550562	0.011236	0
	4e-06	0.0931559	0.338403	0.39924	0.144487	0.0247148	0	0
	5e-06	0.0380658	0.110082	0.167695	0.215021	0.218107	0.164609	0.0864198
	6e-06	0.0409556	0.13083	0.221843	0.25256	0.196815	0.114903	0.0420933
	7e-06	0.0392157	0.129181	0.237601	0.251442	0.198385	0.10842	0.0357555
	8e-06	0.0395913	0.157088	0.260536	0.260536	0.172414	0.083014	0.0268199
Total [P]	3.59e-07
	[L]	[P]	[PL1]	[PL2]	[PL3]	[PL4]	[PL5]	[PL6]
	2e-06	0.599156	0.312236	0.0801688	0	0	0.00843882	0
	3e-06	0.147122	0.473348	0.332623	0.0383795	0.00426439	0.00426439	0
	4e-06	0.0483871	0.187097	0.33871	0.26129	0.114516	0.0435484	0.00645161
	5e-06	0.0282805	0.133484	0.245475	0.264706	0.196833	0.100679	0.030543
	6e-06	0.0759912	0.174009	0.21696	0.235683	0.172907	0.092511	0.0319383
	7e-06	0.0234792	0.090715	0.146211	0.223052	0.226254	0.186766	0.103522
	8e-06	0.0228717	0.0711563	0.144854	0.222363	0.25413	0.19568	0.0889454
Total [P]	3.59e-07
	[L]	[P]	[PL1]	[PL2]	[PL3]	[PL4]	[PL5]	[PL6]
	2e-06	0.6125	0.325	0.0625	0	0	0	0
	3e-06	0.193684	0.48	0.292632	0.0336842	0	0	0
	4e-06	0.073741	0.285971	0.384892	0.18705	0.0557554	0.0125899	0
	5e-06	0.0291005	0.107143	0.219577	0.259259	0.218254	0.123016	0.0436508
	6e-06	0.116691	0.218612	0.289513	0.227474	0.106352	0.0369276	0.00443131
	7e-06	0.0517241	0.179803	0.293103	0.258621	0.146552	0.0578818	0.0123153
	8e-06	0.118124	0.298467	0.25248	0.164112	0.084761	0.0459874	0.0360685
	POPC
Total [P]	3.59e-07
	[L]	[P]	[PL1]	[PL2]	[PL3]	[PL4]	[PL5]	[PL6]
	2e-06	0.861111	0.133333	0	0	0	0.00555556	0
	4e-06	0.872093	0.122093	0	0	0	0.00581395	0
	6e-06	0.406332	0.269129	0.121372	0.0580475	0.0527704	0.0501319	0.0422164
	8e-06	0.556364	0.334545	0.0872727	0.0145455	0	0.00727273	0
	1e-05	0.576336	0.332061	0.0801527	0.00763359	0	0.00381679	0
	1.5e-05	0.484177	0.351266	0.123418	0.0348101	0	0.00632911	0
	2e-05	0.198708	0.319871	0.240711	0.134087	0.0662359	0.0274637	0.0129241
Total [P]	3.59e-07
	[L]	[P]	[PL1]	[PL2]	[PL3]	[PL4]	[PL5]	[PL6]
	2e-06	0.865922	0.128492	0	0	0	0.00558659	0
	4e-06	0.757576	0.20202	0.0353535	0	0	0.00505051	0
	6e-06	0.594488	0.326772	0.0669291	0.00787402	0	0.00393701	0
	8e-06	0.609562	0.306773	0.0717131	0.00796813	0	0.00398406	0
	1e-05	0.527027	0.327703	0.0777027	0.0236486	0.0135135	0.0304054	0
	1.5e-05	0.562712	0.288136	0.0915254	0.0338983	0.0101695	0.0135593	0
	2e-05	0.235937	0.328125	0.220312	0.121875	0.05625	0.0265625	0.0109375
Total [P]	3.59e-07
	[L]	[P]	[PL1]	[PL2]	[PL3]	[PL4]	[PL5]	[PL6]
	2e-06	0.836066	0.153005	0.00546448	0	0	0.00546448	0
	4e-06	0.786802	0.19797	0.0101523	0	0	0.00507614	0
	6e-06	0.627049	0.282787	0.057377	0.0122951	0	0.0204918	0
	8e-06	0.589147	0.325581	0.0736434	0.00775194	0	0.00387597	0
	1e-05	0.353556	0.299163	0.138075	0.0543933	0.041841	0.0585774	0.0543933
	1.5e-05	0.561151	0.305755	0.0935252	0.0179856	0	0.0143885	0.00719424
	2e-05	0.34642	0.325635	0.166282	0.0854503	0.0438799	0.0254042	0.00692841
	POPE
Total [P]	3.59e-07
	[L]	[P]	[PL1]	[PL2]	[PL3]	[PL4]	[PL5]	[PL6]
	2e-06	0.706977	0.251163	0.0232558	0	0	0.0186047	0
	4e-06	0.550877	0.322807	0.0912281	0.0245614	0.00350877	0.00701754	0
	6e-06	0.531469	0.300699	0.104895	0.034965	0.00699301	0.020979	0
	8e-06	0.234711	0.33719	0.226446	0.119008	0.0479339	0.0214876	0.0132231
	1e-05	0.326039	0.330416	0.172867	0.0853392	0.0393873	0.0306346	0.0153173
	1.5e-05	0.183246	0.264398	0.208115	0.143979	0.0876963	0.0693717	0.0431937
	2e-05	0.265082	0.325411	0.177331	0.0914077	0.0585009	0.0457038	0.0365631
Total [P]	3.59e-07
	[L]	[P]	[PL1]	[PL2]	[PL3]	[PL4]	[PL5]	[PL6]
	2e-06	0.682609	0.256522	0.0434783	0	0	0.0173913	0
	4e-06	0.668103	0.267241	0.0431034	0.00431034	0	0.0172414	0
	6e-06	0.409449	0.346457	0.152231	0.0551181	0.015748	0.015748	0.00524934
	8e-06	0.296089	0.312849	0.195531	0.0986965	0.0428305	0.0316574	0.0223464
	1e-05	0.302419	0.332661	0.175403	0.0887097	0.0483871	0.0302419	0.0221774
	1.5e-05	0.207792	0.30303	0.223665	0.139971	0.0663781	0.037518	0.021645
	2e-05	0.200993	0.253102	0.193548	0.122829	0.0843672	0.0632754	0.0818859
Total [P]	3.59e-07
	[L]	[P]	[PL1]	[PL2]	[PL3]	[PL4]	[PL5]	[PL6]
	2e-06	0.684211	0.254386	0.0394737	0.00438596	0	0.0175439	0
	4e-06	0.597015	0.298507	0.0671642	0.011194	0.00373134	0.0223881	0
	6e-06	0.529412	0.326797	0.104575	0.0261438	0	0.0130719	0
	8e-06	0.350446	0.34375	0.174107	0.0736607	0.015625	0.0223214	0.0200893
	1e-05	0.292727	0.316364	0.198182	0.0854545	0.0472727	0.0345455	0.0254545
	1.5e-05	0.303719	0.307851	0.167355	0.0909091	0.0599174	0.0454545	0.0247934
	2e-05	0.256579	0.315789	0.192434	0.113487	0.0493421	0.0427632	0.0296053
	POPG
Total [P]	3.59e-07
	[L]	[P]	[PL1]	[PL2]	[PL3]	[PL4]	[PL5]	[PL6]	[PL7]	[PL8]	[PL9]	[PL10]	[PL11]	[PL12]	[PL13]
	2e-06	0.461538	0.350769	0.126154	0.04	0.00923077	0.00615385	0.00615385	0	0	0	0	0	0	0
	4e-06	0.256705	0.363985	0.216475	0.0977011	0.0344828	0.0153257	0.00766284	0.00766284	0	0	0	0	0	0
	6e-06	0.125	0.235437	0.241505	0.168689	0.100728	0.0691748	0.0315534	0.0145631	0.00970874	0.00364078	0	0	0	0
	8e-06	0.178481	0.268354	0.192405	0.120253	0.0734177	0.0632911	0.0417722	0.0303797	0.0101266	0.00759494	0.00632911	0	0.00506329	0.00253165
	1e-05	0.0648056	0.154536	0.191426	0.178465	0.139581	0.107677	0.0717846	0.0378863	0.0259222	0.0179462	0.00398804	0	0.00199402	0.00398804
	1.5e-05	0.100119	0.22646	0.202622	0.152563	0.0929678	0.0643623	0.0405244	0.0369487	0.0262217	0.0143027	0.011919	0.00953516	0.0143027	0.00715137
	2e-05	0.0129241	0.0565428	0.101777	0.128433	0.148627	0.134087	0.112278	0.0936995	0.0775444	0.0500808	0.0387722	0.0250404	0.0113086	0.0088853
Total [P]	3.59e-07
	[L]	[P]	[PL1]	[PL2]	[PL3]	[PL4]	[PL5]	[PL6]	[PL7]	[PL8]	[PL9]	[PL10]	[PL11]	[PL12]	[PL13]
	2e-06	0.462462	0.36036	0.123123	0.03003	0.012012	0.012012	0	0	0	0	0	0	0	0
	4e-06	0.258176	0.351119	0.218589	0.0981067	0.0413081	0.0172117	0.00516351	0.00688468	0.00344234	0	0	0	0	0
	6e-06	0.284906	0.296226	0.177358	0.0792453	0.0566038	0.0377358	0.0226415	0.0226415	0.0188679	0	0	0	0.00377358	0
	8e-06	0.116009	0.24594	0.222738	0.170534	0.112529	0.0614849	0.0336427	0.0197216	0.0139211	0	0	0	0.00348028	0
	1e-05	0.0772986	0.16192	0.161107	0.153784	0.126119	0.112286	0.0821806	0.0463792	0.0382425	0.0211554	0.0113914	0.00325468	0.00162734	0.00325468
	1.5e-05	0.0397816	0.116225	0.148206	0.147426	0.134165	0.124025	0.099064	0.0764431	0.0460218	0.0296412	0.0163807	0.0109204	0.00624025	0.00546022
	2e-05	0.0108359	0.0743034	0.116099	0.139319	0.143963	0.142415	0.107585	0.0890093	0.0704334	0.0441176	0.0278638	0.0201238	0.00928793	0.00464396
Total [P]	3.59e-07
	[L]	[P]	[PL1]	[PL2]	[PL3]	[PL4]	[PL5]	[PL6]	[PL7]	[PL8]	[PL9]	[PL10]	[PL11]	[PL12]	[PL13]
	2e-06	0.42623	0.382514	0.13388	0.0355191	0.00546448	0.010929	0.00546448	0	0	0	0	0	0	0
	4e-06	0.370558	0.312183	0.14467	0.0736041	0.0482234	0.0253807	0.0152284	0.0101523	0	0	0	0	0	0
	6e-06	0.168901	0.268097	0.233244	0.151475	0.0844504	0.0495979	0.0214477	0.0120643	0.0080429	0	0.00268097	0	0	0
	8e-06	0.117347	0.260204	0.246173	0.173469	0.102041	0.0548469	0.0267857	0.0114796	0.00765306	0	0	0	0	0
	1e-05	0.151134	0.254408	0.193955	0.123426	0.0768262	0.0667506	0.0403023	0.0352645	0.02267	0.0100756	0.0125945	0.00755668	0.00251889	0.00251889
	1.5e-05	0.0941884	0.200401	0.180361	0.126253	0.0931864	0.0751503	0.0490982	0.0400802	0.0350701	0.0230461	0.0200401	0.0210421	0.0260521	0.0160321
	2e-05	0.0174905	0.0623574	0.114829	0.139924	0.139163	0.142966	0.114829	0.0965779	0.0653992	0.0418251	0.0273764	0.0212928	0.00760456	0.00836502
	POPS
Total [P]	3.59e-07
	[L]	[P]	[PL1]	[PL2]	[PL3]	[PL4]	[PL5]	[PL6]	[PL7]	[PL8]	[PL9]	[PL10]	[PL11]	[PL12]	[PL13]	[PL14]	[PL15]	[PL16]
	2e-06	0.309524	0.190476	0.293651	0.119048	0.0515873	0.0198413	0.00396825	0	0	0	0.00396825	0.00396825	0	0	0.00396825	0	0
	4e-06	0.251327	0.168142	0.272566	0.159292	0.0955752	0.0353982	0.0141593	0.00353982	0	0	0	0	0	0	0	0	0
	6e-06	0.0859637	0.112827	0.204164	0.166555	0.159839	0.112827	0.0725319	0.02955	0.00940228	0.00470114	0.00402955	0.00940228	0.0127602	0.00738751	0	0.00537273	0.00268637
	8e-06	0.0346981	0.0846634	0.135323	0.205413	0.19431	0.165163	0.102706	0.0499653	0.018043	0.0055517	0.00277585	0	0	0.00138793	0	0	0
	1e-05	0.054023	0.0844828	0.11954	0.15977	0.148276	0.124138	0.0896552	0.0632184	0.0425287	0.0287356	0.0298851	0.0201149	0.0132184	0.00804598	0.00862069	0.00344828	0.00229885
	1.5e-05	0.0155777	0.0380788	0.0722631	0.102553	0.125487	0.129814	0.122025	0.104717	0.0683687	0.0631761	0.0475984	0.0432713	0.0237992	0.0129814	0.0199048	0.00865426	0.00173085
	2e-05	0.00528402	0.0308234	0.0550418	0.0797006	0.102158	0.14443	0.122413	0.122853	0.0942316	0.0642889	0.0546015	0.0387494	0.0255394	0.0237781	0.01321	0.00924703	0.0136504
Total [P]	3.59e-07
	[L]	[P]	[PL1]	[PL2]	[PL3]	[PL4]	[PL5]	[PL6]	[PL7]	[PL8]	[PL9]	[PL10]	[PL11]	[PL12]	[PL13]	[PL14]	[PL15]	[PL16]
	2e-06	0.334802	0.204846	0.268722	0.118943	0.0528634	0.0198238	0	0	0	0	0	0	0	0	0	0	0
	4e-06	0.119181	0.142458	0.247672	0.219739	0.154562	0.0698324	0.0288641	0.0102421	0.00372439	0	0.0018622	0	0	0	0	0	0.0018622
	6e-06	0.0652999	0.123007	0.202733	0.222475	0.182232	0.123007	0.0455581	0.0265756	0.00455581	0.00303721	0.0015186	0	0	0	0	0	0
	8e-06	0.0590631	0.0889341	0.192804	0.183299	0.162933	0.133062	0.0821453	0.0434487	0.0217244	0.0108622	0.00950441	0.00271555	0.00135777	0.00271555	0.00135777	0.00407332	0
	1e-05	0.0194839	0.0573986	0.100053	0.161137	0.179568	0.171669	0.121116	0.0989995	0.0421274	0.0163244	0.0147446	0.0073723	0.00105319	0.00421274	0.00315956	0	0.00157978
	1.5e-05	0.0091017	0.0395726	0.0633162	0.115156	0.135338	0.146023	0.126632	0.120696	0.0815196	0.0601504	0.0387812	0.0138504	0.0197863	0.0106846	0.00949743	0.00395726	0.00593589
	2e-05	0.00767824	0.0160878	0.0387569	0.0683729	0.105667	0.122852	0.134186	0.117733	0.100914	0.104936	0.0628885	0.0493601	0.0292505	0.020841	0.00877514	0.00585009	0.00585009
Total [P]	3.59e-07
	[L]	[P]	[PL1]	[PL2]	[PL3]	[PL4]	[PL5]	[PL6]	[PL7]	[PL8]	[PL9]	[PL10]	[PL11]	[PL12]	[PL13]	[PL14]	[PL15]	[PL16]
	2e-06	0.425414	0.232044	0.226519	0.0773481	0.0276243	0.0110497	0	0	0	0	0	0	0	0	0	0	0
	4e-06	0.13878	0.154528	0.275591	0.214567	0.125984	0.0531496	0.0177165	0.00492126	0.00393701	0	0	0.00393701	0	0.00393701	0.0019685	0.000984252	0
	6e-06	0.0869565	0.129672	0.222731	0.20595	0.158658	0.0991609	0.0526316	0.0167811	0.00762777	0.00152555	0.00762777	0.00457666	0	0	0.00305111	0.00305111	0
	8e-06	0.0307785	0.066385	0.13277	0.166566	0.185878	0.165359	0.107423	0.050694	0.0259505	0.014484	0.009656	0.0030175	0.0090525	0.01207	0.007242	0.004828	0.0078455
	1e-05	0.0254545	0.0654545	0.109091	0.185455	0.19697	0.16	0.115152	0.08	0.0315152	0.0121212	0.0109091	0.00484848	0	0.00242424	0	0	0.000606061
	1.5e-05	0.0132502	0.0448168	0.0958691	0.136789	0.150039	0.142634	0.13562	0.10756	0.0779423	0.0397506	0.0140296	0.0159782	0.0116913	0.00389712	0.0035074	0.00506625	0.00155885
	2e-05	0.00793651	0.0216049	0.0299824	0.0736332	0.0846561	0.142416	0.139771	0.140653	0.104056	0.0925926	0.0599647	0.0502646	0.0167549	0.0132275	0.00529101	0.00925926	0.00793651
	TOCDL
Total [P]	3.59e-07
	[L]	[P]	[PL1]	[PL2]	[PL3]	[PL4]
	1e-07	0.836449	0.163551	0	0	0
	2e-07	0.698113	0.283019	0.0188679	0	0
	4e-07	0.520249	0.383178	0.0903427	0.00623053	0
	6e-07	0.200814	0.458616	0.256445	0.0759837	0.00814111
	8e-07	0.198336	0.435506	0.263523	0.0873786	0.0152566
	1e-06	0.090991	0.37027	0.34955	0.156757	0.0324324
	1.2e-06	0.0756803	0.352041	0.331633	0.188776	0.0518707
Total [P]	3.59e-07
	[L]	[P]	[PL1]	[PL2]	[PL3]	[PL4]
	1e-07	0.834862	0.165138	0	0	0
	2e-07	0.677419	0.286738	0.0358423	0	0
	4e-07	0.286874	0.487145	0.182679	0.037889	0.00541272
	6e-07	0.172152	0.478481	0.264557	0.0772152	0.00759494
	8e-07	0.120293	0.405858	0.337866	0.124477	0.0115063
	1e-06	0.128	0.420571	0.315429	0.117714	0.0182857
	1.2e-06	0.0700935	0.329907	0.35514	0.200935	0.0439252
Total [P]	3.59e-07
	[L]	[P]	[PL1]	[PL2]	[PL3]	[PL4]
	1e-07	0.827434	0.172566	0	0	0
	2e-07	0.666667	0.298969	0.0343643	0	0
	4e-07	0.294393	0.464174	0.20405	0.0342679	0.00311526
	6e-07	0.21194	0.456716	0.267164	0.0552239	0.00895522
	8e-07	0.142125	0.440461	0.3137	0.0896287	0.0140845
	1e-06	0.0856874	0.378531	0.348399	0.152542	0.0348399
	1.2e-06	0.0588235	0.337858	0.360483	0.19457	0.0482655
	KDL
Total [P]	4.47e-07
	[L]	[P]	[PL1]	[PL2]
	1e-07	0.870813	0.129187	0
	2e-07	0.739837	0.235772	0.0243902
	3e-07	0.693662	0.28169	0.0246479
	4e-07	0.601671	0.339833	0.0584958
	5e-07	0.48564	0.420366	0.0939948
	6e-07	0.422658	0.440087	0.137255
	7e-07	0.434389	0.429864	0.135747
Total [P]	4.47e-07
	[L]	[P]	[PL1]	[PL2]
	1e-07	0.86	0.135	0.005
	2e-07	0.756757	0.23166	0.011583
	3e-07	0.602339	0.336257	0.0614035
	4e-07	0.615616	0.339339	0.045045
	5e-07	0.527523	0.389908	0.0825688
	6e-07	0.433884	0.417355	0.14876
	7e-07	0.435685	0.431535	0.13278
Total [P]	4.47e-07
	[L]	[P]	[PL1]	[PL2]
	1e-07	0.819444	0.171296	0.00925926
	2e-07	0.766284	0.218391	0.0153257
	3e-07	0.608187	0.333333	0.0584795
	4e-07	0.563422	0.356932	0.079646
	5e-07	0.5054	0.397408	0.0971922
	6e-07	0.439825	0.437637	0.122538
	7e-07	0.421053	0.447368	0.131579

[truncated: 6 more sheets: Supp Figure 14, Supp Figure 20, Supp Table 4, Supp Table 5, Supp Table 7, Primers]
